# Supplementary material for: Magnetic chelating nanoprobes for enrichment and selective recovery of metalloproteases from human saliva
Source: Royal Society of Chemistry journal article supplement (doi:10.1039/c4tb01189a), 2014-10-27
Supplement: c4tb01189a1.pdf [file c4tb01189a1.pdf]

## SUPPORTING INFORMATION

### Magnetic chelating nanoprobe for enrichment and selective recovery of metalloproteases from human saliva

*Rui Oliveira-Silva, João Pinto da Costa, Rui Vitorino\*, Ana L. Daniel-da-Silva\**

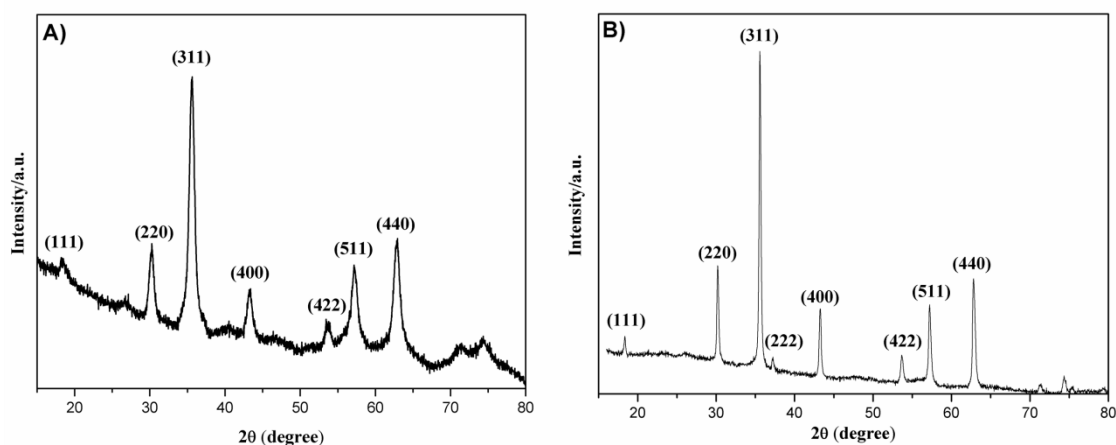

**Figure S1** -A) X-ray diffraction pattern of 12 nm Fe<sub>3</sub>O<sub>4</sub> nanoparticles. B) X-ray diffraction pattern of 50 nm Fe<sub>3</sub>O<sub>4</sub> nanoparticles.

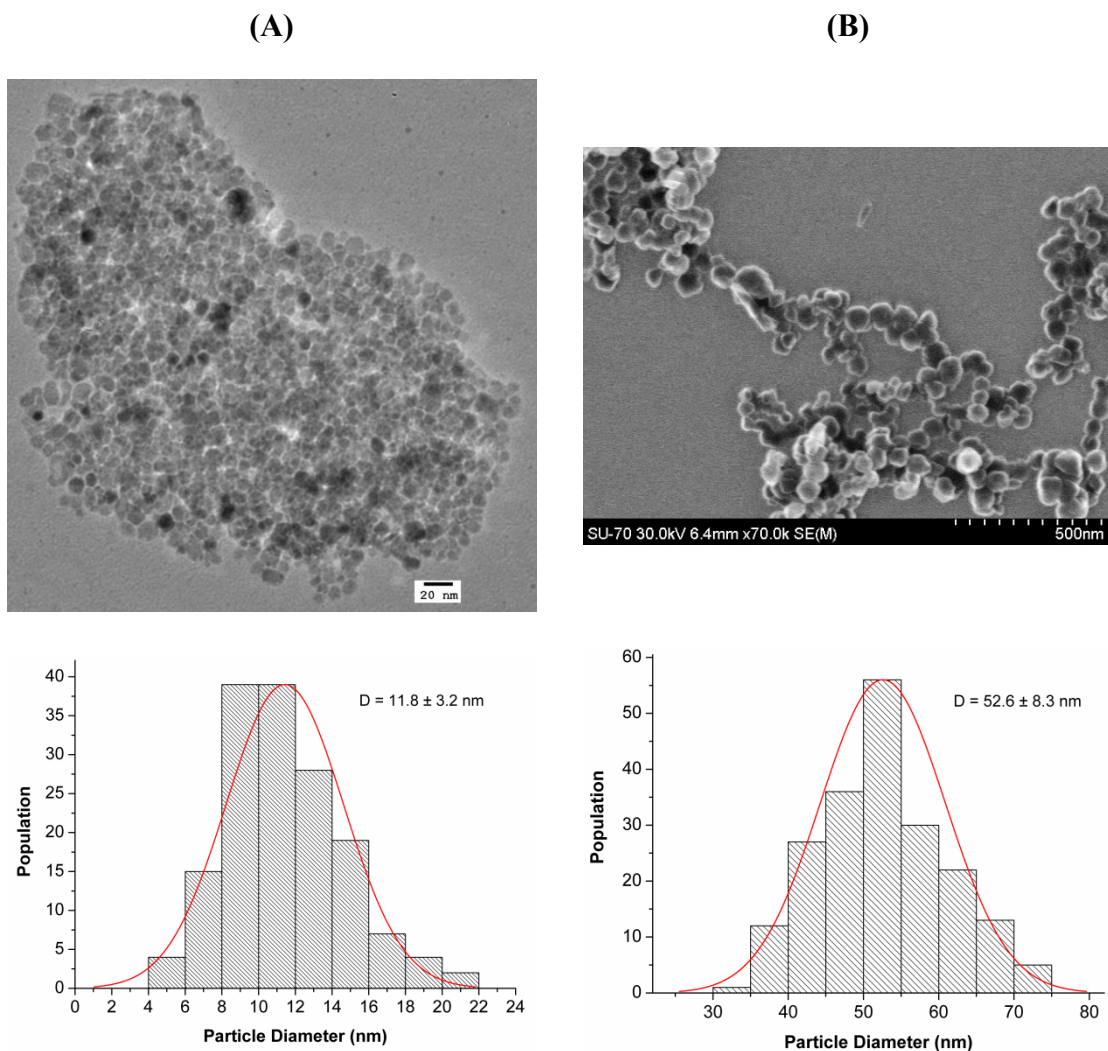

**Figure S2** - Electron micrographs of (A) 12 nm Fe<sub>3</sub>O<sub>4</sub> (TEM) and (B) 50 nm Fe<sub>3</sub>O<sub>4</sub> nanoparticles (SEM) (top) and respective particle size histograms (bottom). The particle diameter was calculated as  $D = \text{mean} \pm t s / \sqrt{n}$ , where  $t$  is  $t$ -score (95% confidence),  $s$  is the standard deviation and  $n$  the sample size.

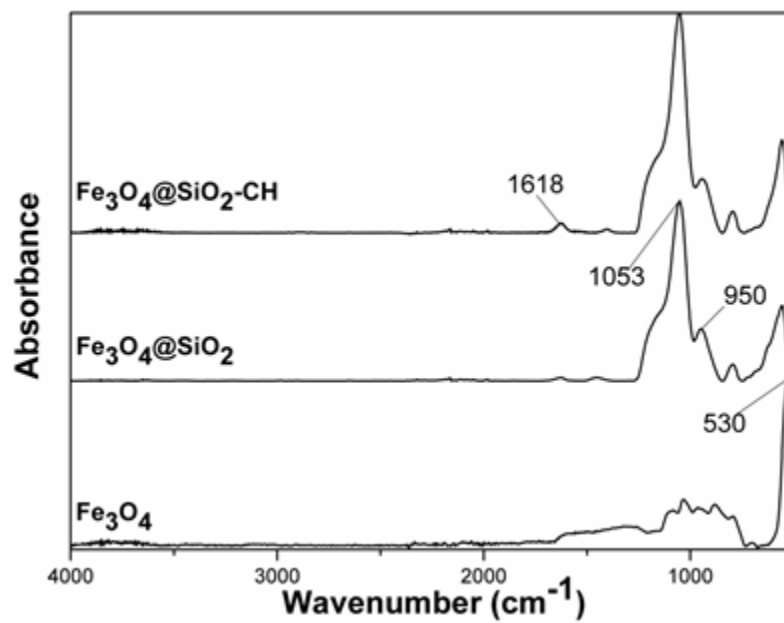

**Figure S3** - ATR-FTIR spectra of 50 nm magnetic core NPs at distinct surface modification steps: Fe<sub>3</sub>O<sub>4</sub>, Fe<sub>3</sub>O<sub>4</sub>@SiO<sub>2</sub> and Fe<sub>3</sub>O<sub>4</sub>@SiO<sub>2</sub>-CH functionalized at 70°C with 500μL of acetic acid during 24 hours.

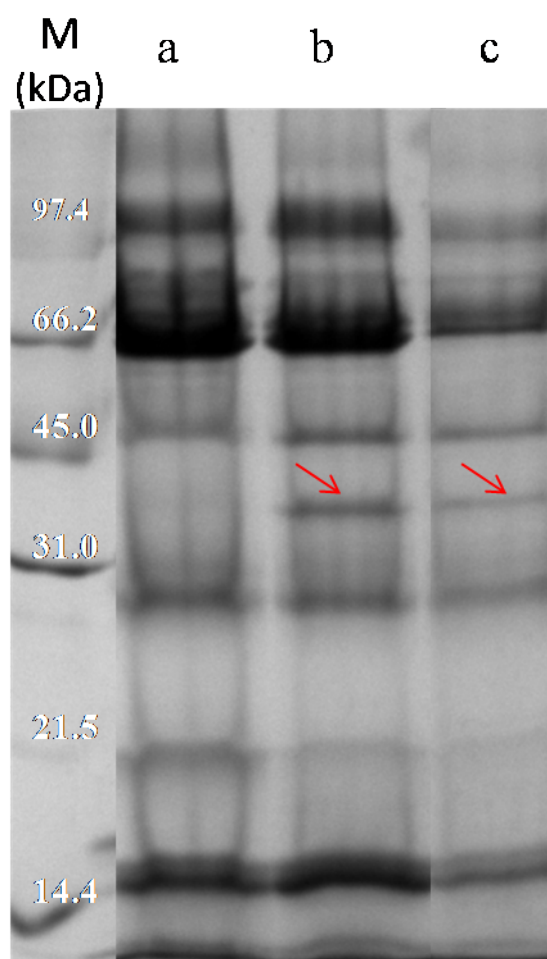

**Figure S4** – SDS-PAGE (15%) gel obtained after the incubation of a)  $50\text{Fe}_3\text{O}_4@\text{SiO}_2\text{-CH}$ , b)  $12\text{Fe}_3\text{O}_4@\text{SiO}_2\text{-CH}$  and c)  $12\text{Fe}_3\text{O}_4$  NPs with human saliva. (M- Marker)
